# Supplementary material
Source: PubMed Central journal article supplement (PMC545916)
Supplement: mbc_E04-10-0927_1.pdf [file mbc_E04-10-0927_1.pdf]

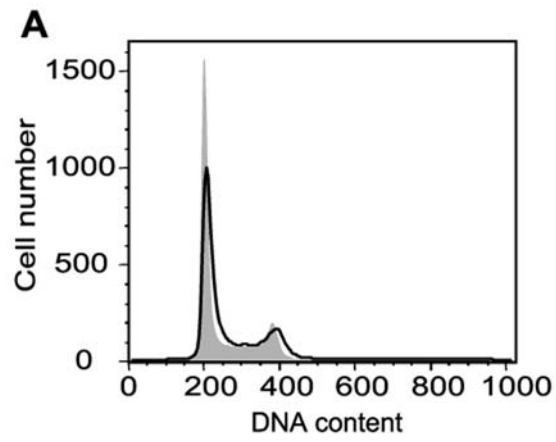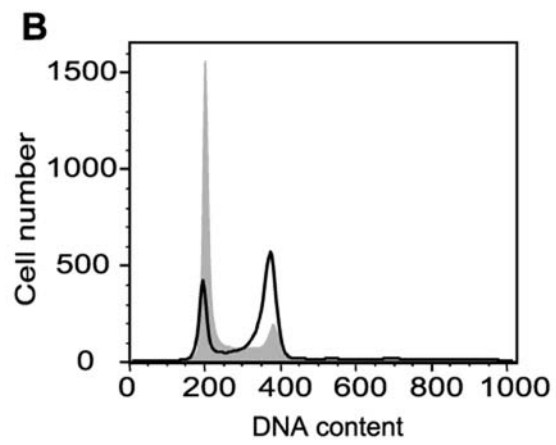

Supplemental Figure 1

Supplemental Figure 2

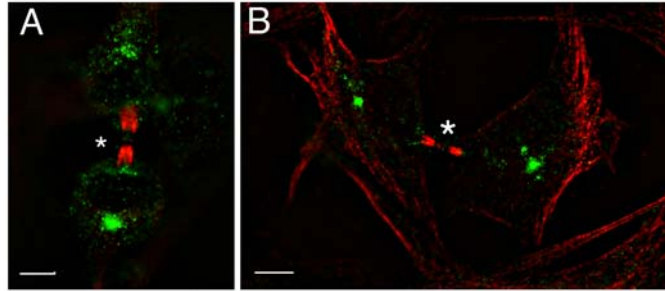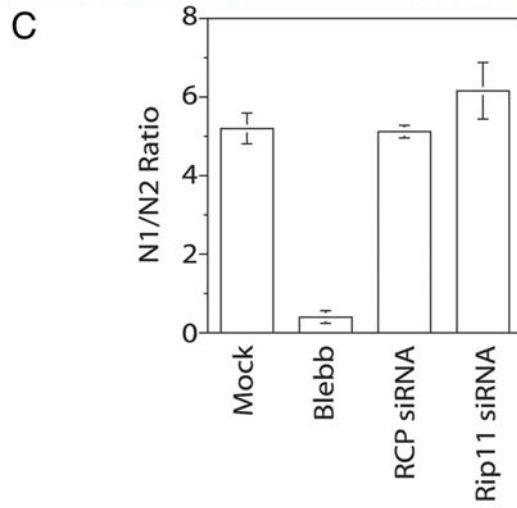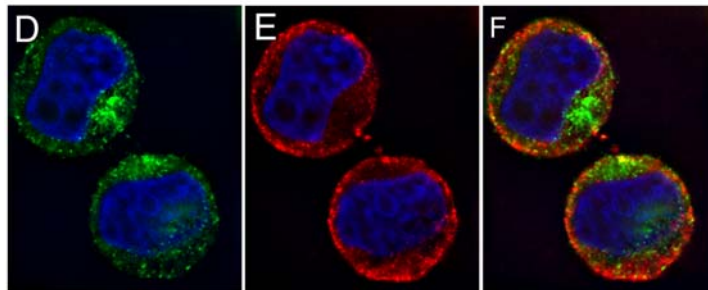

Supplemental Figure 3

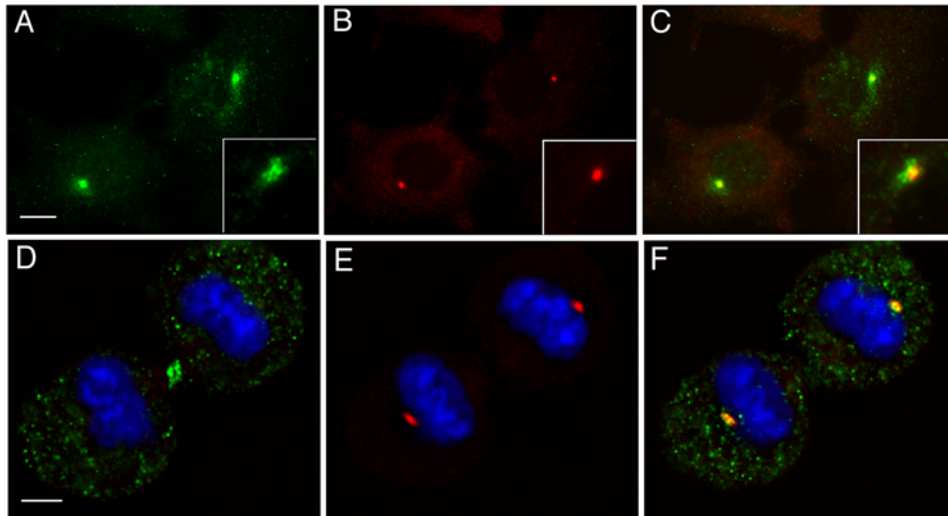

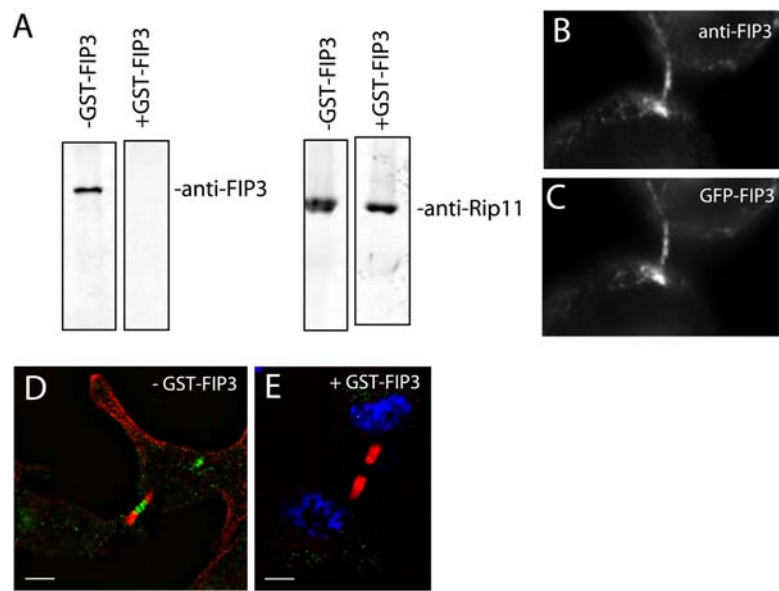

Supplemental 4

Supplemental Figure 5

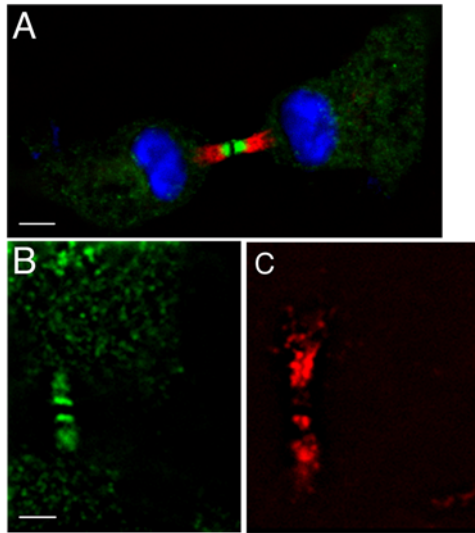

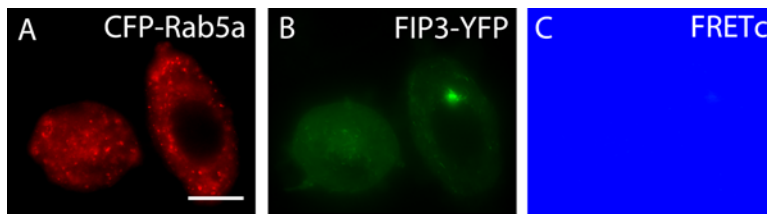

D

|                        | n  | NFRET +/- SD    |
|------------------------|----|-----------------|
| FIP3-YFP/CFP-Rab11a    | 8  | 0.184 +/- 0.05  |
| FIP3-YFP/CFP-Rab5a     | 10 | 0.03 +/- 0.01   |
| FIP3-YFP/CFP-Rab4a     | 8  | 0.01 +/- 0.01   |
| FIP3-YFP/CFP-Rab11a-CC | 7  | 0.005 +/- 0.002 |

Supplemental 6
